# Supplementary material for: Evolution and reform of Medical Microbiology education in New Medical Science era
Source: publisher site journal article supplement (doi:10.1515/gme-2025-0018), 2025-11-18
Supplement: Supplementary file 1 [file j_gme-2025-0018_suppl_001.docx]

Medical Microbiology Course Learning Situation Questionnaire

Instructions

Dear students,

In order to improve the teaching quality of the Medical Microbiology course and better meet your learning needs, we are conducting this survey. Your answers will be kept strictly confidential. Please answer the questions based on your actual situation. Thank you for your support and cooperation!

I. Personal Information

1. Your grade:

A. Freshman

B. Sophomore

C. Junior

D. Senior

E. Fifth - year student

2. Your major:

A. Clinical Medicine

B. Stomatology

C. Preventive Medicine

D. Others (please specify)

## II. Learning Habits

1. How do you usually review the knowledge of Medical Microbiology?

A. Read textbooks and lecture notes repeatedly

B. Do a lot of exercises

C. Make mind maps or summaries

D. Discuss with classmates or teachers

E. Other methods (please describe)

2. When learning about different microorganisms, do you have a habit of comparing and summarizing their characteristics?

A. Always do this

B. Often do this

C. Sometimes do this

D. Seldom do this

E. Never do this

3. How often do you use online learning resources (such as MOOCs, educational videos) to assist your learning of this course?

A. Every day

B. 3 - 4 times a week

C. 1 - 2 times a week

D. Once a month

E. Rarely or never

## III. Knowledge Mastery and Application

1. When learning new knowledge in Medical Microbiology, do you feel it is easy to confuse different microorganisms?

A. Very easy to confuse, often mix up important characteristics

B. A bit easy to confuse, but can distinguish with some effort

C. Not very easy to confuse, can remember most of the differences

D. Hardly get confused

2. In clinical - related case - based learning, how do you think your ability is to apply the knowledge of Medical Microbiology?

A. Very poor, can't connect knowledge with cases at all

B. Poor, can only make simple associations

C. Average, can analyze some common cases

D. Good, can comprehensively analyze and solve complex cases

3. If you encounter an unknown pathogen in a virtual or real - life situation, do you think you can use the knowledge you've learned to make a preliminary judgment?

A. Definitely not, I have no idea how to start

B. Probably not, I lack the necessary skills

C. Maybe, but I'm not sure if it's correct

D. Yes, I'm confident in making a relatively accurate judgment

## IV. Thinking Ability

1. When studying the relationship between microorganisms and the human body, do you consider factors such as the environment and animals?

A. Never consider these factors

B. Seldom consider, only focus on microorganisms and humans

C. Sometimes consider, but not comprehensively

D. Always consider these factors and analyze their interactions

2. Do you think you can view the role of microorganisms in causing diseases and maintaining health from a critical perspective?

A. No, I only think microorganisms are pathogens

B. Hardly, I'm not aware of their positive roles

C. To some extent, but my understanding is shallow

D. Yes, I can analyze their dual - nature thoroughly

3. In group discussions about Microbiology - related topics, do you actively put forward your own unique views?

A. Never, I'm too shy or have no ideas

B. Seldom, I usually follow others' opinions

C. Sometimes, when I'm sure of my views

D. Always, I like to share and discuss different ideas

## V. Disease Prevention and Professional Responsibility

1. In your opinion, which is more important in the study of Medical Microbiology?

A. Understanding the pathogenic mechanisms of microorganisms

B. Learning methods to prevent infectious diseases

C. Both are equally important

D. Others (please explain)

2. When learning about the prevention and control of infectious diseases, do you actively think about how to apply this knowledge in future clinical work?

A. Never think about it

B. Seldom think about it

C. Sometimes think about it, but not seriously

D. Always think about it and try to find practical applications

3. Do you think medical staff should take the initiative to popularize knowledge about the prevention of infectious diseases?

A. It's not their responsibility

B. It's a minor responsibility, not very important

C. It's an important responsibility, but not a top - priority

D. It's a crucial responsibility of medical staff
