# Supplementary material for: Evolution and reform of Medical Microbiology education in New Medical Science era
Source: publisher site journal article supplement (doi:10.1515/gme-2025-0018), 2025-11-18
Supplement: Supplementary file 2 [file j_gme-2025-0018_suppl_003.docx]

Medical Microbiology Course Self-assessment Questionnaire

Instructions

Dear students,

To evaluate the learning outcomes of this course and its impact on you, the course instructors have designed this questionnaire. Your participation is entirely voluntary, and all responses will be kept strictly confidential. Please answer the questions honestly based on your actual experience.

Thank you for your support and cooperation! This survey is solely for educational research purposes related to this course. By participating, you acknowledge your informed consent.

1. Your major:

A. Clinical Medicine

B. Stomatology

C. Preventive Medicine

D. Others (please specify)

2. Does the course implementation meet your learning needs?

A. Fully meets

B. Does not meet

C. Uncertain

3. Do you feel you have achieved the stated course learning objectives?

A. Fully achieved

B. Partially achieved

C. Not achieved

D. Uncertain

4. Through this course, have you learned about contributions of both Chinese and global scientists to microbiology and infectious disease control?

A. Extensive understanding

B. Partial understanding

C. No understanding

D. Not interested

5. The course expanded my knowledge of major discoveries in medical microbiology and sparked my interest in related scientific questions.

A. Agree

B. Disagree

C. Uncertain

6.Through this course, do you understand the critical role of healthcare professionals' expertise and responsibility in microbial and infectious disease control?

A. Complete understanding

B. Partial understanding

C. No understanding

D. Uncertain

7.Did the course help you understand that human-animal-environment harmony is essential for preventing emerging/re-emerging infectious diseases?

A. Complete understanding

B. Partial understanding

C. No understanding

D. Uncertain

8.The course made me realize I must maintain responsibility and aseptic techniques in future clinical work to prevent nosocomial infections.

A. Agree

B. Disagree

C. Uncertain

9. The course taught me fundamental principles of emerging infectious disease pathogen identification.

A. Agree

B. Disagree

C. Uncertain

10. Overall, I am satisfied with the course instruction.

A. Strongly agree

B. Agree

C. Neutral

D. Disagree

E. Strongly disagree
