# Supplementary material for: Evolution and reform of Medical Microbiology education in New Medical Science era
Source: publisher site journal article supplement (doi:10.1515/gme-2025-0018), 2025-11-18
Supplement: Supplementary file 3 [file j_gme-2025-0018_suppl_004.docx]

| Supplementary file 3 | | | |
| --- | --- | --- | --- |
| **Number** | **Project title** | **Achievements** | **Year** |
| 1 | Functional Characterization of Depolymerases in *Klebsiella pneumoniae* Phages | Review publication | 2022 |
| 2 | Role and Mechanism of PRL2 in Exosome Biogenesis and Secretion | Second Prize, National Undergraduate Basic Medical Sciences Innovation Research & Experimental Design Forum | 2022 |
| 3 | Isolation of *Fusobacterium nucleatum* Phages and Their Therapeutic Application in Colorectal Cancer Intervention | Review publication, research paper publication | 2022 |
| 4 | Isolation and Characterization of Bacteriophages Targeting *Klebsiella pneumoniae* | Review publication | 2023 |
| 5 | Advances in Phage Therapy for *Cutibacterium acnes*-Associated Acne Vulgaris |  | 2024 |
| 6 | Cloning, Expression, and Functional Characterization of Polysaccharide Depolymerases Encoded by a *Klebsiella pneumoniae* K25-Specific Bacteriophage |  | 2024 |
| 7 | Toxin Gene Profiling of *Staphylococcus aureus* Isolates from Raw Milk in Shanghai: Correlation with Milk Characteristics |  | 2024 |
| 8 | *Fusobacterium nucleatum* Modulates Host Histone Lactylation to Drive Colorectal Tumorigenesis: Mechanisms and Therapeutic Implications | Silver Prize, National Undergraduate Basic Medical Sciences Innovation Research & Experimental Design Forum; "Future Star" Oral Presentation at the First Ministry of Education Basic Medicine "101 Plan" Top Student Innovation Forum; First Prize in the Basic/Clinical Track (Undergraduate Division - Eastern China Region) of the 10th National Undergraduate Basic Medical Innovation Research & Experimental Design Forum | 2024 |
| 9 | Research on the Application of *Fusobacterium nucleatum* Phage in Tumor Therapy by Targeting Host Bacteria and Activating Anti-Tumor Immune Response | Review publication | 2024 |
| 10 | *Mycobacterium tuberculosis* | Third Prize in the 2024 College Student Science Popularization Speech Competition on Morphology | 2024 |
